# Supplementary material
Source: MDPI journal article supplement (https://www.mdpi.com/2073-4441/13/23/3398)
Supplement: s1 [file s1]

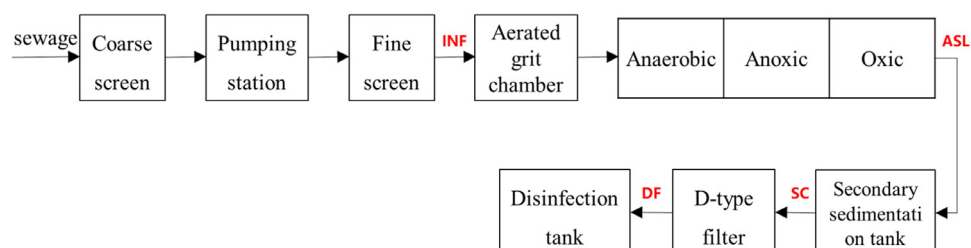

**Figure S1.** Schematic flow diagram of the investigated WWTPs with same process. The sampling points were noted as red prints.

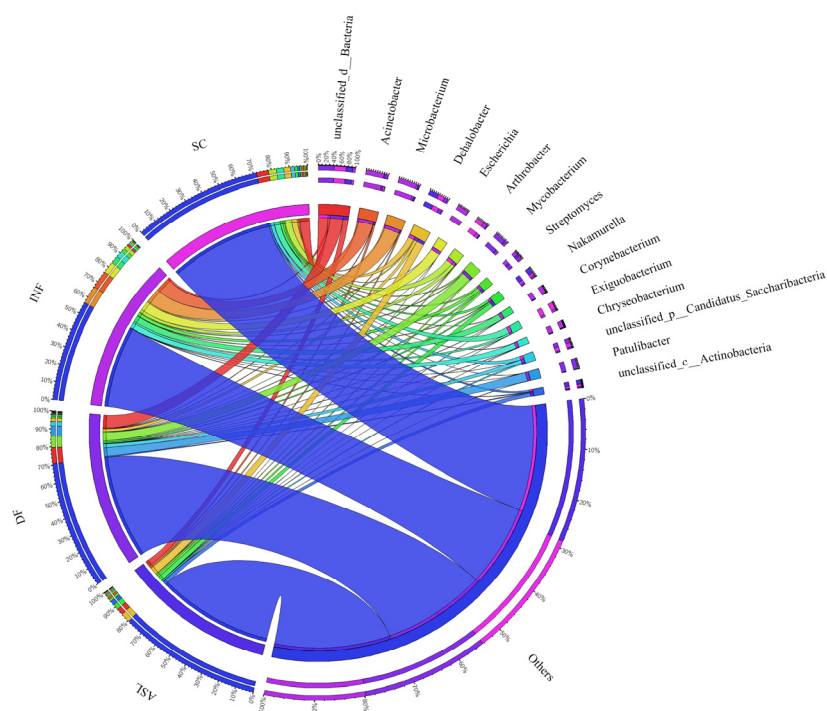

**Figure S2.** Circular representation of bacterial community in INF, ASL, SC and DF at genus level from all the samples. The outmost circles names of sample and microbial composition. The lines inside the circle link the genus to the sample and the line stand for the relative abundance of different genera in the samples.

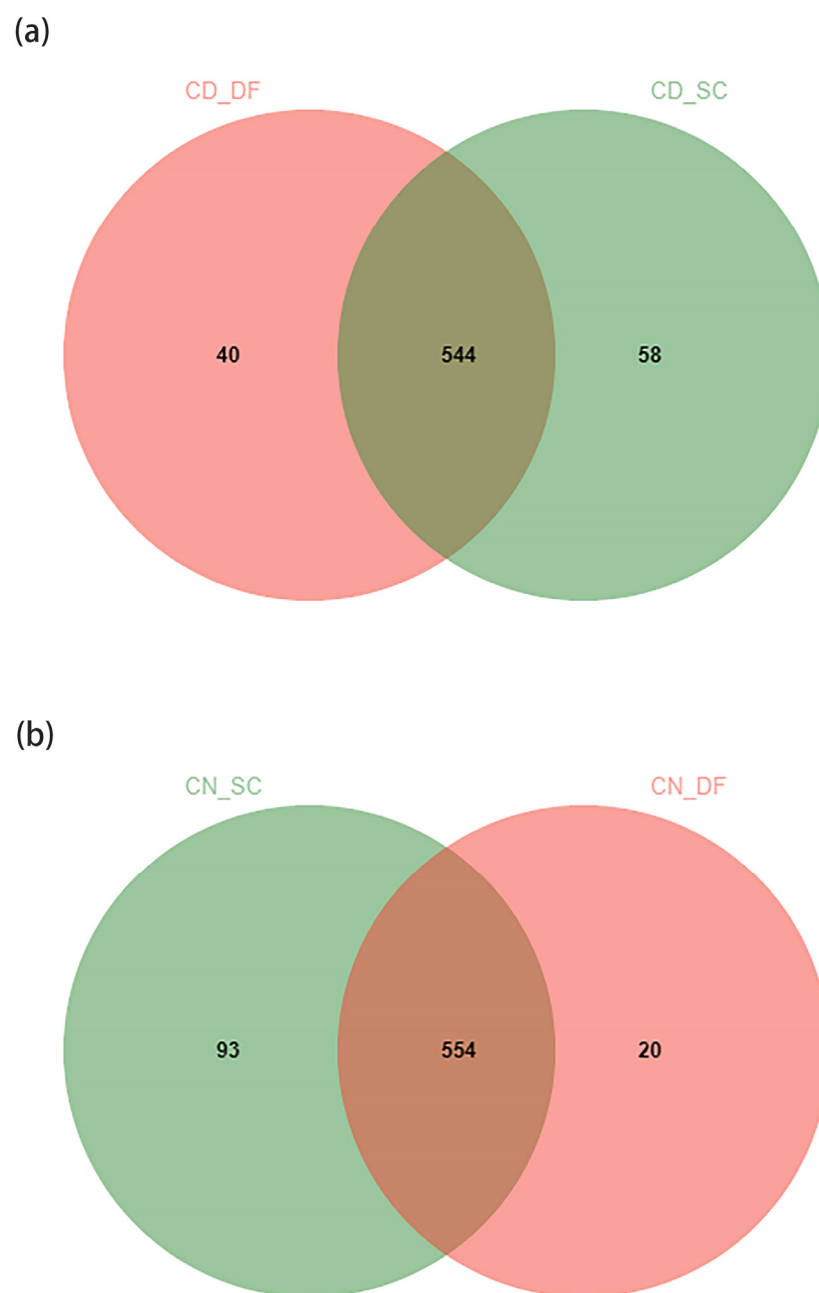

**Figure S3.** Distribution of ARGs subtypes in SC and DF at the two WWTPs.

**Table S1.** Information of accession ID.

| Sample Name | Accession Number |
|-------------|------------------|
| INF1        | SRR16481189      |
| ASL1        | SRR16481188      |
| SC1         | SRR16481187      |
| DF1         | SRR16481186      |
| INF2        | SRR16481185      |
| ASL2        | SRR16481184      |
| SC2         | SRR16481183      |
| DF2         | SRR16481182      |

**Table S2.** ARGs removed from CN and CD plants through D-type filters.

| ARGs Name                | Description                                                                                                                                       | Class   |
|--------------------------|---------------------------------------------------------------------------------------------------------------------------------------------------|---------|
| <i>mphB</i>              | macrolide resistance gene; antibiotic inactivation enzyme                                                                                         | AR      |
| <i>tet38</i>             | efflux pump conferring antibiotic resistance                                                                                                      | AR      |
| <i>L1 beta-lactamase</i> | antibiotic inactivation enzyme; beta-lactam resistance gene                                                                                       | AR      |
| <i>evgA</i>              | efflux pump conferring antibiotic resistance; gene modulating antibiotic efflux                                                                   | AR      |
| <i>ErmS</i>              | antibiotic target modifying enzyme; lincosamide resistance gene; macrolide resistance gene; streptogramin resistance gene                         | AT; ABS |
| <i>OXA-37</i>            | antibiotic inactivation enzyme; beta-lactam resistance gene                                                                                       | AR      |
| <i>OXA-119</i>           | antibiotic inactivation enzyme; beta-lactam resistance gene                                                                                       | AR      |
| <i>AAC(6')-Iad</i>       | antibiotic inactivation enzyme; aminoglycoside resistance gene                                                                                    | AR      |
| <i>aadA13</i>            | antibiotic inactivation enzyme; aminoglycoside resistance gene                                                                                    | AR      |
| <i>arr-2</i>             | rifampin resistance gene; antibiotic inactivation enzyme                                                                                          | AR      |
| <i>vanSE</i>             | glycopeptide resistance gene; gene conferring antibiotic resistance via molecular bypass; antibiotic resistance gene cluster, cassette, or operon | AR      |
| <i>dfrB3</i>             | antibiotic target replacement protein; trimethoprim resistance gene                                                                               | AR; AT  |
| <i>PEDO-1</i>            | antibiotic inactivation enzyme; beta-lactam resistance gene                                                                                       | AR      |
| <i>VanXI</i>             | glycopeptide resistance gene; gene conferring antibiotic resistance via molecular bypass; antibiotic resistance gene cluster, cassette, or operon | AR      |
| <i>leuO</i>              | sulfonamide resistance gene; gene modulating antibiotic efflux                                                                                    | AR      |
